# Supplementary material
Source: PubMed Central journal article supplement (PMC4050613)
Supplement: 1315466111_pnas.201315466SI.pdf [file 1315466111_pnas.201315466SI.pdf]

# Supporting Information

Ostojic et al. 10.1073/pnas.1315466111

## SI Materials and Methods

**Fly Stocks.** The genotypes of the transgenic flies are

- wild-type *Poxn* line 1 [ $w^{1118}$ ; *Poxn*<sup>ΔM22-B5</sup> *SuperA-158*],
- wild-type *Poxn* line 2 [ $w^{1118}$ ; *Poxn*<sup>ΔM22-B5</sup>; *SuperA-207-1*],
- wild-type *Poxn* line 1/line 2 [ $w^{1118}$ ; *Poxn*<sup>ΔM22-B5</sup> *SuperA-158*/*Poxn*<sup>ΔM22-B5</sup>; *SuperA-207-1*/+],
- wild-type *Poxn* line 1/line 2; *dFOXO* [ $w^{1118}$ ; *Poxn*<sup>ΔM22-B5</sup> *SuperA-158*/*Poxn*<sup>ΔM22-B5</sup>; *SuperA-207-1* *dFOXO*<sup>21</sup>/*dFOXO*<sup>25</sup>],
- no labellar taste bristles line 1 [ $w^{1118}$ ; *Poxn*<sup>ΔM22-B5</sup>; *Full1*],
- no labellar taste bristles line 2 [ $w^{1118}$ ; *Poxn*<sup>ΔM22-B5</sup>; *Full115*],
- no labellar taste bristles line 3 [ $w^{1118}$ ; *Poxn*<sup>ΔM22-B5</sup>; *Full152*],
- no labellar taste bristles line 1/line 2 [ $w^{1118}$ ; *Poxn*<sup>ΔM22-B5</sup>; *Full1*/*Full115*],
- no labellar taste bristles line 1/line 3 [ $w^{1118}$ ; *Poxn*<sup>ΔM22-B5</sup>; *Full1*/*Full152*],
- no labellar taste bristles line 2/line 3 [ $w^{1118}$ ; *Poxn*<sup>ΔM22-B5</sup>; *Full115*/*Full152*],
- no labellar taste bristles line 1/line 2; *dFOXO* [ $w^{1118}$ ; *Poxn*<sup>ΔM22-B5</sup>; *Full1* *dFOXO*<sup>25</sup>/*Full115* *dFOXO*<sup>21</sup>],
- missing most taste bristles line 1 [ $\Delta XB$ s  $w^{1118}$ ; *Poxn*<sup>ΔM22-B5</sup>],
- missing most taste bristles line 1/line 2 [ $\Delta XB$ s  $w^{1118}$ ; *Poxn*<sup>ΔM22-B5</sup>;  $\Delta PB$ s/+],
- missing most taste bristles line 1/line 3 [ $\Delta XB$ s  $w^{1118}$ ; *Poxn*<sup>ΔM22-B5</sup>/*Poxn*<sup>ΔM22-B5</sup>  $\Delta PB$ s], and
- missing most taste bristles line 1/line 3; *dFOXO* [ $\Delta XB$ s  $w^{1118}$ ; *Poxn*<sup>ΔM22-B5</sup>/*Poxn*<sup>ΔM22-B5</sup>  $\Delta PB$ s; *dFOXO*<sup>21</sup>/*dFOXO*<sup>25</sup>].

**Backcrosses of the Different Lines to  $w^{1118}$ .** The backcrosses of the *Poxn*<sup>ΔM22-B5</sup> null mutant were followed by PCR. The primers used are as follows.

*Poxn* pair 1:

*dM22fw6*: 5'-GAG CCA ATC CAA TCC AAT TCA ATC-3'

*dM22rev6*: 5'-CTA ACA CCT CCG TTA ATA ATC GCT-3'

*Poxn* pair 2:

*IO\_200n*: 5'-GGATGTTGCAGACTGCGTGCGT-3'

*IO\_259n*: 5'-CGCAGTCGCTTAGCCTCCGT-3'

The backcrosses of the two *dFOXO* mutations to  $w^{1118}$  were followed by PCR and a restriction digest of the resulting product, where the mutation of interest was further confirmed by sequencing. The primers used are as follows.

*forward primer*: 5'-GCAATCAGCAGTTGGCCCCAG

*reverse primer*: 5'-CGAGACCAGCGAGCATGGTGG

For the *dFOXO*<sup>21</sup> mutation, the PCR product was digested with MnlI because the mutation leads to an additional MnlI site. For the *dFOXO*<sup>25</sup> mutation, the PCR product was digested with FokI because the mutation leads to loss of a FokI site.

The different transgenic chromosomes were backcrossed by following the rescue of the  $w^{1118}$  eye phenotype because all transgenes also carry sequences that rescue the  $w^{1118}$  mutation.

After backcrossing the different chromosomes, the *Poxn*<sup>ΔM22-B5</sup> mutation was combined with different rescuing transgenes, which in the case of two of the transgenic lines involved the recombination of the second chromosome. The presence of the rescuing transgene in the *Poxn*<sup>ΔM22-B5</sup> mutant background was then followed by rescue of the visible *Poxn*<sup>ΔM22-B5</sup> phenotypes in the taste bristles and male genitalia. The *dFOXO* mutations were introduced into the relevant lines through recombination of the third chromosome, and their presence was confirmed by PCR and sequencing. Because we sometimes used the balancer line *Sp/CyO*; *MKR*s/*TM6b* to isolate specific mutations or transgenes, we also backcrossed *Sp/CyO*; *MKR*s/*TM6b* to  $w^{1118}$ . This is because recombination can still occur with some of the balancer chromosomes, e.g., the *Sp* chromosome.

For the gustatory receptor mutants, the mutations were followed by PCR based on the previous descriptions of the mutations (1–7).

**Feeding Assays.** Control and taste mutant flies were collected at the same time as described in the *Materials and Methods, Lifespan Assays, Zurich* section of the main text (Zurich protocol). Flies were transferred regularly to fresh food until the specified days of adulthood, upon which flies were transferred to vials containing food sources (standard Zurich fly food and yeast supplement) that had been dyed with FD&C Blue no. 1 (Brilliant Blue FCF, Sigma) at a final concentration of 0.5 g dye per 100 g food. This dye is metabolically neutral and thermostable (8). Flies were allowed to feed on the dyed food sources for either 6 h (3–12 biological replicates and 4–5 flies per replicate) or 24 h (3–4 biological replicates and 7–10 flies per replicate) at 25 °C, after which they were decapitated and the bodies collected. For the 6-h feeding regimen, each replicate of fly bodies was then homogenized in 150  $\mu$ L PBS/0.05% Triton X-100 (Fisher Scientific) solution and subsequently centrifuged at 5,000  $\times$  g for 1 min to remove debris. For the 24-h feeding regimen, each replicate was homogenized in 10  $\mu$ L PBS/0.05% Triton X-100 solution and centrifuged at 13,000  $\times$  g for 15 min. The absorbances of the control and taste mutant supernatants were measured together at 630 nm and the amount of food consumed was estimated from a standard curve of the same dye solution. The differences between the groups were assessed using a one-way ANOVA test.

**Body Weight and Triacylglyceride Measurements.** Newly eclosed flies were collected and kept in groups of 10 per vial as described in the main text (*Materials and Methods, Lifespan Assays, Zurich*), with regular transfers onto fresh fly food at 25 °C. To determine the body weight, 30 individual male or female flies per age group per genotype were measured. To determine triacylglyceride (TAG) levels, flies were aged for 5 or 10 d, after which five replicates (9–10 flies per replicate) per genotype were snap-frozen in liquid nitrogen. Then, at 4 °C, the wet weights of the flies were measured before homogenization in PBS/0.05% Triton-X-100 buffer. Subsequently, TAG levels were determined with a Serum Triglyceride Determination Kit [Abcam (catalog no. ab65336) or Sigma (catalog no. TR0100)], according to the manufacturer's instructions. The protein levels of the same flies were also determined using the standard BioRad protein assay (BioRad), and the resulting TAG levels were normalized per milligram of protein. To test for differences between groups in all our measurements, we performed a one-way ANOVA test.

**Quantitative Measurement of mRNA Levels.** We measured the relative abundance of specific mRNAs through quantitative





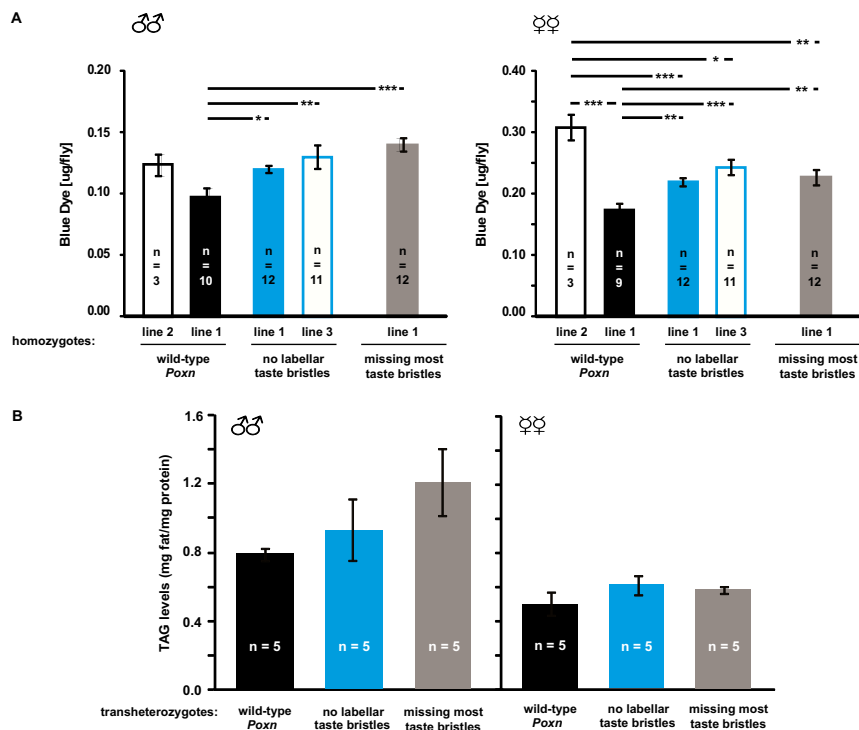

**Fig. S2.** Feeding phenotypes and TAG levels of taste-impaired flies. (A) Seven- to 8-d-old taste-impaired adult mutant males and females (homozygous lines) are compared with controls after a 6-h feeding regimen. The food consumption values (blue dye) are normalized per fly and each mean is derived from the indicated number (*n*) of biological replicates of four to five pooled flies. All error bars represent  $\pm$ SEM.  $*P \leq 0.01$ ,  $**P \leq 0.01$ , and  $***P \leq 0.001$ , according to one-way ANOVA with Fisher's post hoc test. Note that one of the control lines (wild-type *Poxn* line 2) has a smaller *n* compared with the rest of the lines. However, the observed food intake levels do not correlate with lifespan because both female wild-type *Poxn* lines have a shorter lifespan than the female taste-impaired lines (Table S1, treatment J.7 to J.12). (B) TAG levels of 5-d-old adult taste-mutant and control flies that carry transheterozygous insertions of the relevant transgenes in their genomes have similar TAG content (one-way ANOVA *F* test). Each mean represents five biological replicates of 9 to 10 pooled flies. All error bars again represent  $\pm$ SEM.

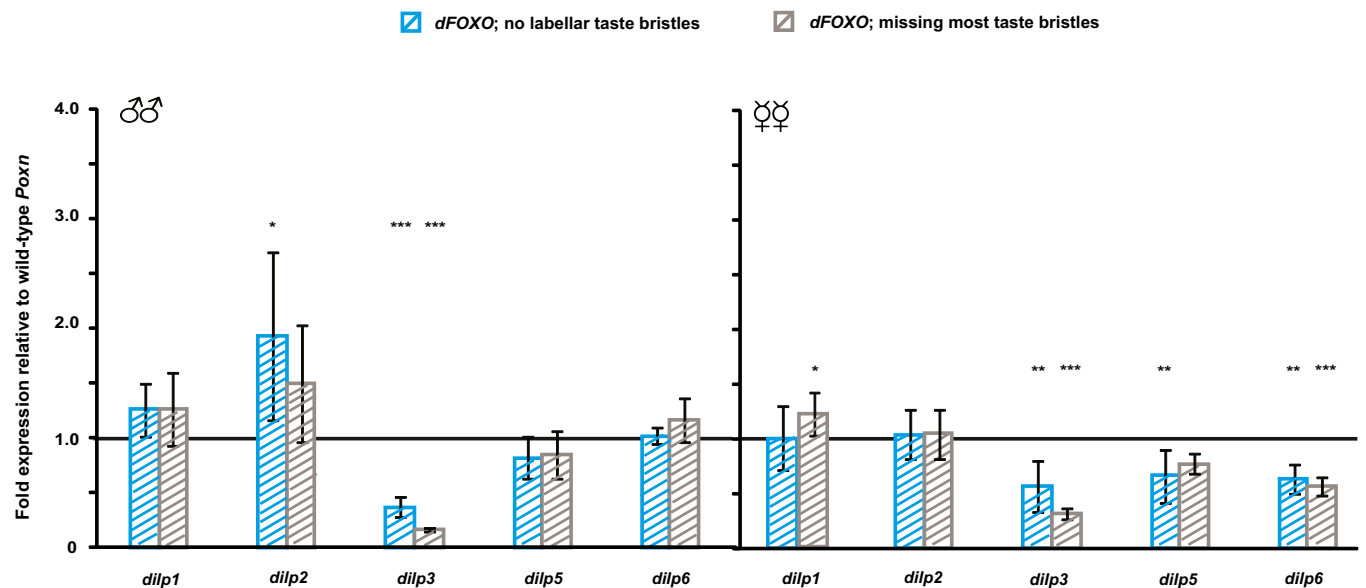

**Fig. S3.** *dilp* expression in control and taste-impaired flies in the absence of *dFOXO*. *dilps* in the heads of adult male and female taste mutants (blue and gray bars) that lack *dFOXO* are shown normalized to control levels (horizontal line across the graph). Each mean value shown represents two to three biological replicates of 30 pooled flies, which again carry transheterozygous insertions of the relevant transgenes in their genomes. All error bars represent  $\pm$ SEM.  $*P < 0.05$ ,  $**P < 0.01$ , and  $***P \leq 0.001$ .
